# Supplementary material for: Access to denture restoration services under removable dentures subsidy program for adults aged 65 years and older in Taiwan- an interpretive approach
Source: Springer Nature journal article supplement (doi:10.1186/s12913-022-07504-6), 2022-01-20
Supplement: MOESM1 [file 20052710]

Data set:

<https://dep.mohw.gov.tw/domhaoh/cp-486-39243-107.html>

<https://dep.mohw.gov.tw/domhaoh/cp-486-1917-107.html>

[https://ws.moi.gov.tw/001/Upload/OldFile/site\\_stuff/321/2/year/year.html](https://ws.moi.gov.tw/001/Upload/OldFile/site_stuff/321/2/year/year.html)

<https://dep.mohw.gov.tw/dos/cp-4033-42732-113.html>

<https://dph.tycg.gov.tw/care/home.jsp?id=246&parentpath=0,241>
